# Supplementary material for: Distribution of Type I Restriction–Modification Systems in Streptococcus suis: An Outlook
Source: MDPI journal article supplement (doi:10.3390/pathogens5040062), 2016-11-18
Supplement: s1 [file s1]

TRD1

```

861160 -----TTGTCAGAAAGTCGGTAGCTATGTCTCTGAAAAAATC
920694 -----TTGTCAGAAAGTCGGTAGCTATGTCTCTGAAAAAATC
941372 -----TTGTCAGAAAGTCGGTAGCTATGTCTCTGAAAAAATC
2001171 -----TTGTCAGAAAGTCGGTAGCTATGTCTCTGAAAAAATC
GD-0098 -----TTGTCAGAAAGTCGGTAGCTATGTCTCTGAAAAAATC
940255 -----TTGTCAGAAAGTCGGTAGCTATGTCTCTGAAAAAATC
950136 -----TTGTCAGAAAGTCGGTAGCTATGTCTCTGAAAAAATC
2012092 -----TTGTCAGAAAGTCGGTAGCTATGTCTCTGAAAAAATC
2302008 -----TTGTCAGAAAGTCGGTAGCTATGTCTCTGAAAAAATC
2051729 -----TTGTCAGAAAGTCGGTAGCTATGTCTCTGAAAAAATC
GD-0073 -----TTGTCAGAAAGTCGGTAGCTATGTCTCTGAAAAAATC
GD-0096 -----TTGTCAGAAAGTCGGTAGCTATGTCTCTGAAAAAATC
931260 TTGAACGATTGGAAATGGGTAAAGATTTTCAGAAATCATAGATTTT---AATCCAAAAGAA
GD-0057 TTGAACGATTGGAAATGGGTAAAGCTTTTCAGAAATCATAGATTTT---AATCCAAAAGAA
GD-0119 TTGAACGATTGGAAATGGGTAAAGATTTTCAGAAATCATAGATTTT---AATCCAAAAGAA
YS12    TTGAACGATTGGAAATGGGTAAAGCTTTTCAGAAATCATAGATTTT---AATCCAAAAGAA

```

```

861160 AATGTGAGTAAGTTAAGGCTGGAGAACTATATTTCTACCGAGAATATGATCTCTAATCGT
920694 AATGTGAGTAAGTTAAGGCTGGAGAACTATATTTCTACCGAGAATATGATCTCTAATCGT
941372 AATGTGAGTAAGTTAAGGCTGGAGAACTATATTTCTACCGAGAATATGATCTCTAATCGT
2001171 AATGTGAGTAAGTTAAGGCTGGAGAACTATATTTCTACCGAGAATATGATCTCTAATCGT
GD-0098 AATGTGAGTAAGTTAAGGCTGGAGAACTATATTTCTACCGAGAATATGATCTCTAATCGT
940255 AATGTGAGTAAGTTAAGGCTGGAGAACTATATTTCTACCGAGAATATGATCTCTAATCGT
950136 AATGTGAGTAAGTTAAGGCTGGAGAACTATATTTCTACCGAGAATATGATCTCTAATCGT
2012092 AATGTGAGTAAGTTAAGGCTGGAGAACTATATTTCTACCGAGAATATGATCTCTAATCGT
2302008 AATGTGAGTAAGTTAAGGCTGGAGAACTATATTTCTACCGAGAATATGATCTCTAATCGT
2051729 AATGTGAGTAAGTTAAGGCTGGAGAACTATATTTCTACCGAGAATATGATCTCTAATCGT
GD-0073 AATGTGAGTAAGTTAAGGCTGGAGAACTATATTTCTACCGAGAATATGATCTCTAATCGT
GD-0096 AATGTGAGTAAGTTAAGGCTGGAGAACTATATTTCTACCGAGAATATGATCTCTAATCGT
931260 CGGTTGCTTAAGGGAAAGCATTTCTAAAAAAATAGCAATGGAAAAAATAGAACCATTCACT
GD-0057 CGGTTGCTTAAGGGAAAGCATTTCTAAAAAAATAGCAATGGAAAAAATAGAACCATTCACT
GD-0119 CGGTTGCTTAAGGGAAAGCATTTCTAAAAAAATAGCAATGGAAAAAATAGAACCATTCACT
YS12    CGGTTGCTTAAGGGAAAGCATTTCTAAAAAAATAGCAATGGAAAAAATAGAACCATTCACT

```

```

861160 GGTGGAATTAGTTTGGCAACAAAACTTCCAAGGTAAAAAACTACAACGTCATTTCAAAG
920694 GGTGGAATTAGTTTGGCAACAAAACTTCCAAGGTAAAAAACTACAACGTCATTTCAAAG
941372 GGTGGAATTAGTTTGGCAACAAAACTTCCAAGGTAAAAAACTACAACGTCATTTCAAAG
2001171 GGTGGAATTAGTTTGGCAACAAAACTTCCAAGGTAAAAAACTACAACGTCATTTCAAAG
GD-0098 GGTGGAATTAGTTTGGCAACAAAACTTCCAAGGTAAAAAACTACAACGTCATTTCAAAG
940255 GGTGGAATTAGTTTGGCAACAAAACTTCCAAGGTAAAAAACTACAACGTCATTTCAAAG
950136 GGTGGAATTAGTTTGGCAACAAAACTTCCAAGGTAAAAAACTACAACGTCATTTCAAAG
2012092 GGTGGAATTAGTTTGGCAACAAAACTTCCAAGGTAAAAAACTACAACGTCATTTCAAAG
2302008 GGTGGAATTAGTTTGGCAACAAAACTTCCAAGGTAAAAAACTACAACGTCATTTCAAAG
2051729 GGTGGAATTAGTTTGGCAACAAAACTTCCAAGGTAAAAAACTACAACGTCATTTCAAAG
GD-0073 GGTGGAATTAGTTTGGCAACAAAACTTCCAAGGTAAAAAACTACAACGTCATTTCAAAG
GD-0096 GGTGGAATTAGTTTGGCAACAAAACTTCCAAGGTAAAAAACTACAACGTCATTTCAAAG
931260 CGTGATATTTCTGAGTTTGAGAGATTA---GAATTTAAAGGAGGTACAAAATTTAGAAAT
GD-0057 CGTGATATTTCTGAGTTTGAGAGATTA---GAATTTAAAGGAGGTACAAAATTTAGAAAT
GD-0119 CGTGATATTTCTGAGTTTGAGAGATTA---GAATTTAAAGGAGGTACAAAATTTAGAAAT
YS12    CGTGATATTTCTGAGTTTGAGAGATTA---GAATTTAAAGGAGGTACAAAATTTAGAAAT

```

---

|         |                                                            |
|---------|------------------------------------------------------------|
| 861160  | GGAGATATTCTAATTTCCAATATTCGCCCTTACTTTAAG-----               |
| 920694  | GGAGATATTCTAATTTCCAATATTCGCCCTTACTTTAAG-----               |
| 941372  | GGAGATATTCTAATTTCCAATATTCGCCCTTACTTTAAG-----               |
| 2001171 | GGAGATATTCTAATTTCCAATATTCGCCCTTACTTTAAG-----               |
| GD-0098 | GGAGATATTCTAATTTCCAATATTCGCCCTTACTTTAAG-----               |
| 940255  | GGAGATATTCTAATTTCCAATATTCGCCCTTACTTTAAG-----               |
| 950136  | GGAGATATTCTAATTTCCAATATTCGCCCTTACTTTAAG-----               |
| 2012092 | GGAGATATTCTAATTTCCAATATTCGCCCTTACTTTAAG-----               |
| 2302008 | GGAGATATTCTAATTTCCAATATTCGCCCTTACTTTAAG-----               |
| 2051729 | GGAGATATTCTAATTTCCAATATTCGCCCTTACTTTAAG-----               |
| GD-0073 | GGAGATATTCTAATTTCCAATATTCGCCCTTACTTTAAG-----               |
| GD-0096 | GGAGATATTCTAATTTCCAATATTCGCCCTTACTTTAAG-----               |
| 931260  | GGCGATACTTTAATAGCCCGTATTACGCCAGTCTTAAAAATGGGAAACAGCTAAGGTA |
| GD-0057 | GGCGATACTTTAATAGCCCGTATTACGCCAGTCTTAAAAATGGGAAACAGCTAAGGTA |
| GD-0119 | GGCGATACTTTAATAGCCCGTATTACGCCAGTCTTAAAAATGGGAAACAGCTAAGGTA |
| YS12    | GGCGATACTTTAATAGCCCGTATTACGCCAGTCTTAAAAATGGGAAACAGCTAAGGTA |

---

|         |                                                               |
|---------|---------------------------------------------------------------|
| 861160  | AAAAATTTGGCTAGCAGACAAATCTGGAGGGTGTTCTAATGATGTTTTAGTAATCAGGTCG |
| 920694  | AAAAATTTGGCTAGCAGACAAATCTGGAGGGTGTTCTAATGATGTTTTAGTAATCAGGTCG |
| 941372  | AAAAATTTGGCTAGCAGACAAATCTGGAGGGTGTTCTAATGATGTTTTAGTAATCAGGTCG |
| 2001171 | AAAAATTTGGCTAGCAGACAAATCTGGAGGGTGTTCTAATGATGTTTTAGTAATCAGGTCG |
| GD-0098 | AAAAATTTGGCTAGCAGACAAATCTGGAGGGTGTTCTAATGATGTTTTAGTAATCAGGTCG |
| 940255  | AAAAATTTGGCTAGCAGACAAATCTGGAGGGTGTTCTAATGATGTTTTAGTAATCAGGTCG |
| 950136  | AAAAATTTGGCTAGCAGACAAATCTGGAGGGTGTTCTAATGATGTTTTAGTAATCAGGTCG |
| 2012092 | AAAAATTTGGCTAGCAGACAAATCTGGAGGGTGTTCTAATGATGTTTTAGTAATCAGGTCG |
| 2302008 | AAAAATTTGGCTAGCAGACAAATCTGGAGGGTGTTCTAATGATGTTTTAGTAATCAGGTCG |
| 2051729 | AAAAATTTGGCTAGCAGACAAATCTGGAGGGTGTTCTAATGATGTTTTAGTAATCAGGTCG |
| GD-0073 | AAAAATTTGGCTAGCAGACAAATCTGGAGGGTGTTCTAATGATGTTTTAGTAATCAGGTCG |
| GD-0096 | AAAAATTTGGCTAGCAGACAAATCTGGAGGGTGTTCTAATGATGTTTTAGTAATCAGGTCG |
| 931260  | AACCTTACTGGATGAAGATGAAATAGGGTTTGGTTCAACAGAATTTATCGTAGCAAGAGCC |
| GD-0057 | AACCTTACTGGATGAAGATGAAATAGGGTTTGGTTCAACAGAATTTATCGTAGCAAGAGCC |
| GD-0119 | AACCTTACTGGATGAAGATGAAATAGGGTTTGGTTCAACAGAATTTATCGTAGCAAGAGCC |
| YS12    | AACCTTACTGGATGAAGATGAAATAGGGTTTGGTTCAACAGAATTTATCGTAGCAAGAGCC |

---

|         |                                                              |
|---------|--------------------------------------------------------------|
| 861160  | GACAGTAACTTTTCCAAC---CGTTTTCTATATTATGTGCTATCAAGTGATACATTTTTT |
| 920694  | GACAGTAACTTTTCCAAC---CGTTTTCTATATTATGTGCTATCAAGTGATACATTTTTT |
| 941372  | GACAGTAACTTTTCCAAC---CGTTTTCTATATTATGTGCTATCAAGTGATACATTTTTT |
| 2001171 | GACAGTAACTTTTCCAAC---CGTTTTCTATATTATGTGCTATCAAGTGATACATTTTTT |
| GD-0098 | GACAGTAACTTTTCCAAC---CGTTTTCTATATTATGTGCTATCAAGTGATACATTTTTT |
| 940255  | GACAGTAACTTTTCCAAC---CGTTTTCTATATTATGTGCTATCAAGTGATACATTTTTT |
| 950136  | GACAGTAACTTTTCCAAC---CGTTTTCTATATTATGTGCTATCAAGTGATACATTTTTT |
| 2012092 | GACAGTAACTTTTCCAAC---CGTTTTCTATATTATGTGCTATCAAGTGATACATTTTTT |
| 2302008 | GACAGTAACTTTTCCAAC---CGTTTTCTATATTATGTGCTATCAAGTGATACATTTTTT |
| 2051729 | GACAGTAACTTTTCCAAC---CGTTTTCTATATTATGTGCTATCAAGTGATACATTTTTT |
| GD-0073 | GACAGTAACTTTTCCAAC---CGTTTTCTATATTATGTGCTATCAAGTGATACATTTTTT |
| GD-0096 | GACAGTAACTTTTCCAAC---CGTTTTCTATATTATGTGCTATCAAGTGATACATTTTTT |
| 931260  | AAAAAAGGTATTAGTGATGAAAAATTTGTTTATTATCTAATGCTTGACCCAAAGGTTAGA |
| GD-0057 | AAAAAAGGTATTAGTGATGAAAAATTTGTTTATTATCTAATGCTTGACCCAAAGGTTAGA |
| GD-0119 | AAAAAAGGTATTAGTGATGAAAAATTTGTTTATTATCTAATGCTTGACCCAAAGGTTAGA |
| YS12    | AAAAAAGGTATTAGTGATGAAAAATTTGTTTATTATCTAATGCTTGACCCAAAGGTTAGA |

861160 GATTATGCA<sup>AGTATCAACTTCTAAGGGGACGAAG</sup>---ATGCCCCGTGGAGATAAGAGTTCA  
920694 GATTATGCA<sup>AGTATCAACTTCTAAGGGGACGAAG</sup>---ATGCCCCGTGGAGATAAGAGTTCA  
941372 GATTATGCA<sup>AGTATCAACTTCTAAGGGGACGAAG</sup>---ATGCCCCGTGGAGATAAGAGTTCA  
2001171 GATTATGCA<sup>AGTATCAACTTCTAAGGGGACGAAG</sup>---ATGCCCCGTGGAGATAAGAGTTCA  
GD-0098 GATTATGCA<sup>AGTATCAACTTCTAAGGGGACGAAG</sup>---ATGCCCCGTGGAGATAAGAGTTCA  
940255 GATTATGCA<sup>AGTATCAACTTCTAAGGGGACGAAG</sup>---ATGCCCCGTGGAGATAAGAGTTCA  
950136 GATTATGCA<sup>AGTATCAACTTCTAAGGGGACGAAG</sup>---ATGCCCCGTGGAGATAAGAGTTCA  
2012092 GATTATGCA<sup>AGTATCAACTTCTAAGGGGACGAAG</sup>---ATGCCCCGTGGAGATAAGAGTTCA  
2302008 GATTATGCA<sup>AGTATCAACTTCTAAGGGGACGAAG</sup>---ATGCCCCGTGGAGATAAGAGTTCA  
2051729 GATTATGCA<sup>AGTATCAACTTCTAAGGGGACGAAG</sup>---ATGCCCCGTGGAGATAAGAGTTCA  
GD-0073 GATTATGCA<sup>AGTATCAACTTCTAAGGGGACGAAG</sup>---ATGCCCCGTGGAGATAAGAGTTCA  
GD-0096 GATTATGCA<sup>AGTATCAACTTCTAAGGGGACGAAG</sup>---ATGCCCCGTGGAGATAAGAGTTCA  
931260 GAAGTTGCTATCAAA<sup>TCAATGGTAGGAACTTCTGGAA</sup>GACAAAGAGTTCAGCTAGATGTT  
GD-0057 GAAGTTGCTATCAAA<sup>TCAATGGTAGGAACTTCTGGAA</sup>GACAAAGAGTTCAGCTAGATGTT  
GD-0119 GAAGTTGCTATCAAA<sup>TCAATGGTAGGAACTTCTGGAA</sup>GACAAAGAGTTCAGCTAGATGTT  
YS12 GAAGTTGCTATCAAA<sup>TCAATGGTAGGAACTTCTGGAA</sup>GACAAAGAGTTCAGCTAGATGTT

861160 ATTATGAAATATACAG<sup>TTCTTTATTTTCCTTAGAGGAGCAAGAGTTGATTT</sup>CAGATATA  
920694 ATTATGAAATATACAG<sup>TTCTTTATTTTCCTTAGAGGAGCAAGAGTTGATTT</sup>CAGATATA  
941372 ATTATGAAATATACAG<sup>TTCTTTATTTTCCTTAGAGGAGCAAGAGTTGATTT</sup>CAGATATA  
2001171 ATTATGAAATATACAG<sup>TTCTTTATTTTCCTTAGAGGAGCAAGAGTTGATTT</sup>CAGATATA  
GD-0098 ATTATGAAATATACAG<sup>TTCTTTATTTTCCTTAGAGGAGCAAGAGTTGATTT</sup>CAGATATA  
940255 ATTATGAAATATACAG<sup>TTCTTTATTTTCCTTAGAGGAGCAAGAGTTGATTT</sup>CAGATATA  
950136 ATTATGAAATATACAG<sup>TTCTTTATTTTCCTTAGAGGAGCAAGAGTTGATTT</sup>CAGATATA  
2012092 ATTATGAAATATACAG<sup>TTCTTTATTTTCCTTAGAGGAGCAAGAGTTGATTT</sup>CAGATATA  
2302008 ATTATGAAATATACAG<sup>TTCTTTATTTTCCTTAGAGGAGCAAGAGTTGATTT</sup>CAGATATA  
2051729 ATTATGAAATATACAG<sup>TTCTTTATTTTCCTTAGAGGAGCAAGAGTTGATTT</sup>CAGATATA  
GD-0073 ATTATGAAATATACAG<sup>TTCTTTATTTTCCTTAGAGGAGCAAGAGTTGATTT</sup>CAGATATA  
GD-0096 ATTATGAAATATACAG<sup>TTCTTTATTTTCCTTAGAGGAGCAAGAGTTGATTT</sup>CAGATATA  
931260 GTTCAGAATTACGAA<sup>ATTCTATGTCCTCCATTAGAGGAGCAAATTCAAATTGGC</sup>AGAATT  
GD-0057 GTTCAGAATTACGAA<sup>ATTCTATGTCCTCCATTAGAGGAGCAAATTCAAATTGGC</sup>AGAATT  
GD-0119 GTTCAGAATTACGAA<sup>ATTCTATGTCCTCCATTAGAGGAGCAAATTCAAATTGGC</sup>AGAATT  
YS12 GTTCAGAATTACGAA<sup>ATTCTATGTCCTCCATTAGAGGAGCAAATTCAAATTGGC</sup>AGAATT

#### Conserved region TRD2

861160 TTGAAGTCCTATGAC<sup>GAGAAAAATAAACTTAATAAA</sup>CAGATAAATCATCATTTACTTGAG  
920694 TTGAAGTCCTATGAC<sup>GAGAAAAATAAACTTAATAAA</sup>CAGATAAATCATCATTTACTTGAG  
941372 TTGAAGTCCTATGAC<sup>GAGAAAAATAAACTTAATAAA</sup>CAGATAAATCATCATTTACTTGAG  
2001171 TTGAAGTCCTATGAC<sup>GAGAAAAATAAACTTAATAAA</sup>CAGATAAATCATCATTTACTTGAG  
GD-0098 TTGAAGTCCTATGAC<sup>GAGAAAAATAAACTTAATAAA</sup>CAGATAAATCATCATTTACTTGAG  
940255 TTGAAGTCCTATGAC<sup>GAGAAAAATAAACTTAATAAA</sup>CAGATAAATCATCATTTAGCTGAG  
950136 TTGAAGTCCTATGAC<sup>GAGAAAAATAAACTTAATAAA</sup>CAGATAAATCATCATTTAGCTGAG  
2012092 TTGAAGTCCTATGAC<sup>GAGAAAAATAAACTTAATAAA</sup>CAGATAAATCATCATTTAGCTGAG  
2302008 TTGAAGTCCTATGAC<sup>GAGAAAAATAAACTTAATAAA</sup>CAGATAAATCATCATTTAGCTGAG  
2051729 TTGAAGTCCTATGAC<sup>GAGAAAAATAAACTTAATAAA</sup>CAGATAAATCATCATTTAGCTGAG  
GD-0073 TTGAAGTCCTATGAC<sup>GAGAAAAATAAACTTAATAAA</sup>CAGATAAATCATCATTTAGCTGAG  
GD-0096 TTGAAGTCCTATGAC<sup>GAGAAAAATAAACTTAATAAA</sup>CAGATAAATCATCATTTAGCTGAG  
931260 TTGAGTGTAATTGAT<sup>GATAAAATGAAAATAATAAAAA</sup>GATAAATCATCATTTACTTGAG  
GD-0057 TTGAGTGTAATTGAT<sup>GATAAAATGAAAATAATAAAAA</sup>GATAAATCATCATTTACTTGAG  
GD-0119 TTGAGTGTAATTGAT<sup>GATAAAATGAAAATAATAAAAA</sup>GATAAATCATCATTTACTTGAG  
YS12 TTGAGTGTAATTGAT<sup>GATAAAATGAAAATAATAAAAA</sup>GATAAATCATCATTTAGCTGAG

---

|         |                                                               |
|---------|---------------------------------------------------------------|
| 861160  | CAAGCTAGATTGCTTTATAAAAAATTTAATATCGTCTAATGACACTAAATATCAAAATCTT |
| 920694  | CAAGCTAGATTGCTTTATAAAAAATTTAATATCGTCTAATGACACTAAATATCAAAATCTT |
| 941372  | CAAGCTAGATTGCTTTATAAAAAATTTAATATCGTCTAATGACACTAAATATCAAAATCTT |
| 2001171 | CAAGCTAGATTGCTTTATAAAAAATTTAATATCGTCTAATGACACTAAATATCAAAATCTT |
| GD-0098 | CAAGCTAGATTGCTTTATAAAAAATTTAATATCGTCTAATGACACTAAATATCAAAATCTT |
| 940255  | CTAATCGATGCTCAATTTGCTCAGTTGCTTGAAGATAATGAATTATATAAGTCGACCTTT  |
| 950136  | CTAATCGATGCTCAATTTGCTCAGTTGCTTGAAGATAATGAATTATATAAGTCGACCTTT  |
| 2012092 | CTAATCGATGCTCAATTTGCTCAGTTGCTTGAAGATAATGAATTATATAAGTCGACCTTT  |
| 2302008 | CTAATCGATGCTCAATTTGCTCAGTTGCTTGAAGATAATGAATTATATAAGTCGACCTTT  |
| 2051729 | CTAATCGATGCTCAATTTGCTCAGTTGCTTGAAGATAATGAATTATATAAGTCGACCTTT  |
| GD-0073 | CTAATCGATGCTCAATTTGCTCAGTTGCTTGAAGATAATGAATTATATAAGTCGACCTTT  |
| GD-0096 | CTAATCGATGCTCAATTTGCTCAGTTGCTTGAAGATAATGAATTATATAAGTCGACCTTT  |
| 931260  | CAAGCTAGATTGCTTTATAAAAAATTTAATATCGTCTAATGACACTAAATATCAAAATCTT |
| GD-0057 | CAAGCTAGATTGCTTTATAAAAAATTTAATATCGTCTAATGACACTAAATATCAAAATCTT |
| GD-0119 | CAAGCTAGATTGCTTTATAAAAAATTTAATATCGTCTAATGACACTAAATATCAAAATCTT |
| YS12    | CTAATCGATGCTCAATTTGCTCAGTTGCTTGAAGATAATGAATTATATAAGTCGACCTTT  |

---

|         |                                                             |
|---------|-------------------------------------------------------------|
| 861160  | TCAGATATTGCTAGAATTACGATGGGACAATCTCCTAAG-----GGTGAGACTTAT    |
| 920694  | TCAGATATTGCTAGAATTACGATGGGACAATCTCCTAAG-----GGTGAGACTTAT    |
| 941372  | TCAGATATTGCTAGAATTACGATGGGACAATCTCCTAAG-----GGTGAGACTTAT    |
| 2001171 | TCAGATATTGCTAGAATTACGATGGGACAATCTCCTAAG-----GGTGAGACTTAT    |
| GD-0098 | TCAGATATTGCTAGAATTACGATGGGACAATCTCCTAAG-----GGTGAGACTTAT    |
| 940255  | TCAGAAATTGGTGAATAGTGGGCGGTGGTACGCCATCTAAAAAGGTAGATGATTACTGG |
| 950136  | TCAGAAATTGGTGAATAGTGGGCGGTGGTACGCCATCTAAAAAGGTAGATGATTACTGG |
| 2012092 | TCAGAAATTGGTGAATAGTGGGCGGTGGTACGCCATCTAAAAAGGTAGATGATTACTGG |
| 2302008 | TCAGAAATTGGTGAATAGTGGGCGGTGGTACGCCATCTAAAAAGGTAGATGATTACTGG |
| 2051729 | TCAGAAATTGGTGAATAGTGGGCGGTGGTACGCCATCTAAAAAGGTAGATGATTACTGG |
| GD-0073 | TCAGAAATTGGTGAATAGTGGGCGGTGGTACGCCATCTAAAAAGGTAGATGATTACTGG |
| GD-0096 | TCAGAAATTGGTGAATAGTGGGCGGTGGTACGCCATCTAAAAAGGTAGATGATTACTGG |
| 931260  | TCAGATATTGCTAGAATTACGATGGGACAATCTCCTAAG-----GGTGAGACTTAT    |
| GD-0057 | TCAGATATTGCTAGAATTACGATGGGACAATCTCCTAAG-----GGTGAGACTTAT    |
| GD-0119 | TCAGATATTGCTAGAATTACGATGGGACAATCTCCTAAG-----GGTGAGACTTAT    |
| YS12    | TCAGAAATTGGTGAATAGTGGGCGGTGGTACGCCATCTAAAAAGGTAGATGATTACTGG |

---

|         |                                                              |
|---------|--------------------------------------------------------------|
| 861160  | AATGATGAC-----AAGATTGGTTTGCCGTTATTAAT                        |
| 920694  | AATGATGAC-----AAGATTGGTTTGCCGTTATTAAT                        |
| 941372  | AATGATGAC-----AAGATTGGTTTGCCGTTATTAAT                        |
| 2001171 | AATGATGAC-----AAGATTGGTTTGCCGTTATTAAT                        |
| GD-0098 | AATGATGAC-----AAGATTGGTTTGCCGTTATTAAT                        |
| 940255  | AATGGTGATATCCCATGGCTTTCTCCAAAAGATTTATCATTAAATCCTGCTATGTTTACA |
| 950136  | AATGGTGATATCCCATGGCTTTCTCCAAAAGATTTATCATTAAATCCTGCTATGTTTACA |
| 2012092 | AATGGTGATATCCCATGGCTTTCTCCAAAAGATTTATCATTAAATCCTGCTATGTTTACA |
| 2302008 | AATGGTGATATCCCATGGCTTTCTCCAAAAGATTTATCATTAAATCCTGCTATGTTTACA |
| 2051729 | AATGGTGATATCCCATGGCTTTCTCCAAAAGATTTATCATTAAATCCTGCTATGTTTACA |
| GD-0073 | AATGGTGATATCCCATGGCTTTCTCCAAAAGATTTATCATTAAATCCTGCTATGTTTACA |
| GD-0096 | AATGGTGATATCCCATGGCTTTCTCCAAAAGATTTATCATTAAATCCTGCTATGTTTACA |
| 931260  | AATGATGAC-----AAGATTGGTTTGCCGTTATTAAT                        |
| GD-0057 | AATGATGAC-----AAGATTGGTTTGCCGTTATTAAT                        |
| GD-0119 | AATGATGAC-----AAGATTGGTTTGCCGTTATTAAT                        |
| YS12    | AATGGTGATATCCCATGGCTTTCTCCAAAAGATTTATCATTAAATCCTGCTATGTTTACA |

---

|         |                                                             |
|---------|-------------------------------------------------------------|
| 861160  | GGAGCTACAGACTTCAGAAACAGTATTTACCCCTCAAATGGACATCTGATCCTAGAAAA |
| 920694  | GGAGCTACAGACTTCAGAAACAGTATTTACCCCTCAAATGGACATCTGATCCTAGAAAA |
| 941372  | GGAGCTACAGACTTCAGAAACAGTATTTACCCCTCAAATGGACATCTGATCCTAGAAAA |
| 2001171 | GGAGCTACAGACTTCAGAAACAGTATTTACCCCTCAAATGGACATCTGATCCTAGAAAA |
| GD-0098 | GGAGCTACAGACTTCAGAAACAGTATTTACCCCTCAAATGGACATCTGATCCTAGAAAA |
| 940255  | GGTAGAGGT-----CAAATTCAATCACTGAGCTTGGCTATAAGAAGAGCAGTGCTAAG  |
| 950136  | GGTAGAGGT-----CAAATTCAATCACTGAGCTTGGCTATAAGAAGAGCAGTGCTAAG  |
| 2012092 | GGTAGAGGT-----CAAATTCAATCACTGAGCTTGGCTATAAGAAGAGCAGTGCTAAG  |
| 2302008 | GGTAGAGGT-----CAAATTCAATCACTGAGCTTGGCTATAAGAAGAGCAGTGCTAAG  |
| 2051729 | GGTAGAGGT-----CAAATTCAATCACTGAGCTTGGCTATAAGAAGAGCAGTGCTAAG  |
| GD-0073 | GGTAGAGGT-----CAAATTCAATCACTGAGCTTGGCTATAAGAAGAGCAGTGCTAAG  |
| GD-0096 | GGTAGAGGT-----CAAATTCAATCACTGAGCTTGGCTATAAGAAGAGCAGTGCTAAG  |
| 931260  | GGAGCTACAGACTTCAGAAACAGTATTTACCCCTCAAATGGACATCTGATCCTAGAAAA |
| GD-0057 | GGAGCTACAGACTTCAGAAACAGTATTTACCCCTCAAATGGACATCTGATCCTAGAAAA |
| GD-0119 | GGAGCTACAGACTTCAGAAACAGTATTTACCCCTCAAATGGACATCTGATCCTAGAAAA |
| YS12    | GGTAGAGGT-----CAAATTCAATCACTGAGCTTGGCTATAAGAAGAGCAGTGCTAAG  |

---

|         |                                                               |
|---------|---------------------------------------------------------------|
| 861160  | ATAGCTAGACCTGGAGAATATGTGTTTGGTGTGAGAGCAACTATTGGTTTAAACAACAAAA |
| 920694  | ATAGCTAGACCTGGAGAATATGTGTTTGGTGTGAGAGCAACTATTGGTTTAAACAACAAAA |
| 941372  | ATAGCTAGACCTGGAGAATATGTGTTTGGTGTGAGAGCAACTATTGGTTTAAACAACAAAA |
| 2001171 | ATAGCTAGACCTGGAGAATATGTGTTTGGTGTGAGAGCAACTATTGGTTTAAACAACAAAA |
| GD-0098 | ATAGCTAGACCTGGAGAATATGTGTTTGGTGTGAGAGCAACTATTGGTTTAAACAACAAAA |
| 940255  | TTAATGCCTCGGAATTCAATACTTTTCAGTTCCCGCGCTCCGATTGGTTATATCACCATA  |
| 950136  | TTAATGCCTCGGAATTCAATACTTTTCAGTTCCCGCGCTCCGATTGGTTATATCACCATA  |
| 2012092 | TTAATGCCTCGGAATTCAATACTTTTCAGTTCCCGCGCTCCGATTGGTTATATCACCATA  |
| 2302008 | TTAATGCCTCGGAATTCAATACTTTTCAGTTCCCGCGCTCCGATTGGTTATATCACCATA  |
| 2051729 | TTAATGCCTCGGAATTCAATACTTTTCAGTTCCCGCGCTCCGATTGGTTATATCACCATA  |
| GD-0073 | TTAATGCCTCGGAATTCAATACTTTTCAGTTCCCGCGCTCCGATTGGTTATATCACCATA  |
| GD-0096 | TTAATGCCTCGGAATTCAATACTTTTCAGTTCCCGCGCTCCGATTGGTTATATCACCATA  |
| 931260  | ATAGCTAGACCTGGAGAATATGTGTTTGGTGTGAGAGCAACTATTGGTTTAAACAACAAAA |
| GD-0057 | ATAGCTAGACCTGGAGAATATGTGTTTGGTGTGAGAGCAACTATTGGTTTAAACAACAAAA |
| GD-0119 | ATAGCTAGACCTGGAGAATATGTGTTTGGTGTGAGAGCAACTATTGGTTTAAACAACAAAA |
| YS12    | TTAATGCCTCGGAATTCAATACTTTTCAGTTCCCGCGCTCCGATTGGTTATATCACCATA  |

---

|         |                                                              |
|---------|--------------------------------------------------------------|
| 861160  | ATATTTAAAGAATATGCTATTGGTCGAGGAACAGGTAGTGCAAAACCAATTTCTAATATC |
| 920694  | ATATTTAAAGAATATGCTATTGGTCGAGGAACAGGTAGTGCAAAACCAATTTCTAATATC |
| 941372  | ATATTTAAAGAATATGCTATTGGTCGAGGAACAGGTAGTGCAAAACCAATTTCTAATATC |
| 2001171 | ATATTTAAAGAATATGCTATTGGTCGAGGAACAGGTAGTGCAAAACCAATTTCTAATATC |
| GD-0098 | ATATTTAAAGAATATGCTATTGGTCGAGGAACAGGTAGTGCAAAACCAATTTCTAATATC |
| 940255  | GCAGAAAATGATATTTCAACTAACCAAGGTTTTAAGTCAATCATTCCCAACCTGAATAC  |
| 950136  | GCAGAAAATGATATTTCAACTAACCAAGGTTTTAAGTCAATCATTCCCAACCTGAATAC  |
| 2012092 | GCAGAAAATGATATTTCAACTAACCAAGGTTTTAAGTCAATCATTCCCAACCTGAATAC  |
| 2302008 | GCAGAAAATGATATTTCAACTAACCAAGGTTTTAAGTCAATCATTCCCAACCTGAATAC  |
| 2051729 | GCAGAAAATGATATTTCAACTAACCAAGGTTTTAAGTCAATCATTCCCAACCTGAATAC  |
| GD-0073 | GCAGAAAATGATATTTCAACTAACCAAGGTTTTAAGTCAATCATTCCCAACCTGAATAC  |
| GD-0096 | GCAGAAAATGATATTTCAACTAACCAAGGTTTTAAGTCAATCATTCCCAACCTGAATAC  |
| 931260  | ATATTTAAAGAATATGCTATTGGTCGAGGAACAGGTAGTGCAAAACCAATTTCTAATATC |
| GD-0057 | ATATTTAAAGAATATGCTATTGGTCGAGGAACAGGTAGTGCAAAACCAATTTCTAATATC |
| GD-0119 | ATATTTAAAGAATATGCTATTGGTCGAGGAACAGGTAGTGCAAAACCAATTTCTAATATC |
| YS12    | GCAGAAAATGATATTTCAACTAACCAAGGTTTTAAGTCAATCATTCCCAACCTGAATAC  |

---

|         |                                                           |
|---------|-----------------------------------------------------------|
| 861160  | TTTGATGAATATTTATTTTTGCTTTGGAGACCTTTTGTACTATGCTAATCTTGGT   |
| 920694  | TTTGATGAATATTTATTTTTGCTTTGGAGACCTTTTGTACTATGCTAATCTTGGT   |
| 941372  | TTTGATGAATATTTATTTTTGCTTTGGAGACCTTTTGTACTATGCTAATCTTGGT   |
| 2001171 | TTTGATGAATATTTATTTTTGCTTTGGAGACCTTTTGTACTATGCTAATCTTGGT   |
| GD-0098 | TTTGATGAATATTTATTTTTGCTTTGGAGACCTTTTGTACTATGCTAATCTTGGT   |
| 940255  | CCATATACTTTCTGTATGAACTCTTGAACAGGAACTCCTTCCCTCGAGAGTAGTGCT |
| 950136  | CCATATACTTTCTGTATGAACTCTTGAACAGGAACTCCTTCCCTCGAGAGTAGTGCT |
| 2012092 | CCATATACTTTCTGTATGAACTCTTGAACAGGAACTCCTTCCCTCGAGAGTAGTGCT |
| 2302008 | CCATATACTTTCTGTATGAACTCTTGAACAGGAACTCCTTCCCTCGAGAGTAGTGCT |
| 2051729 | CCATATACTTTCTGTATGAACTCTTGAACAGGAACTCCTTCCCTCGAGAGTAGTGCT |
| GD-0073 | CCATATACTTTCTGTATGAACTCTTGAACAGGAACTCCTTCCCTCGAGAGTAGTGCT |
| GD-0096 | CCATATACTTTCTGTATGAACTCTTGAACAGGAACTCCTTCCCTCGAGAGTAGTGCT |
| 931260  | TTTGATGAATATTTATTTTTGCTTTGGAGACCTTTTGTACTATGCTAATCTTGGT   |
| GD-0057 | TTTGATGAATATTTATTTTTGCTTTGGAGACCTTTTGTACTATGCTAATCTTGGT   |
| GD-0119 | TTTGATGAATATTTATTTTTGCTTTGGAGACCTTTTGTACTATGCTAATCTTGGT   |
| YS12    | CCATATACTTTCTGTATGAACTCTTGAACAGGAACTCCTTCCCTCGAGAGTAGTGCT |

---

|         |                                                              |
|---------|--------------------------------------------------------------|
| 861160  | TCGGGAACAGTTTATATAAATATTTCAAATCTGATTCGATAGCTTCAAAGTTATTCTT   |
| 920694  | TCGGGAACAGTTTATATAAATATTTCAAATCTGATTCGATAGCTTCAAAGTTATTCTT   |
| 941372  | TCGGGAACAGTTTATATAAATATTTCAAATCTGATTCGATAGCTTCAAAGTTATTCTT   |
| 2001171 | TCGGGAACAGTTTATATAAATATTTCAAATCTGATTCGATAGCTTCAAAGTTATTCTT   |
| GD-0098 | TCGGGAACAGTTTATATAAATATTTCAAATCTGATTCGATAGCTTCAAAGTTATTCTT   |
| 940255  | TCAGGTTCTACATTTAAAGAGGTATCTGGAACCTATTTGAAGAACCATGAGATTCGAATT |
| 950136  | TCAGGTTCTACATTTAAAGAGGTATCTGGAACCTATTTGAAGAACCATGAGATTCGAATT |
| 2012092 | TCAGGTTCTACATTTAAAGAGGTATCTGGAACCTATTTGAAGAACCATGAGATTCGAATT |
| 2302008 | TCAGGTTCTACATTTAAAGAGGTATCTGGAACCTATTTGAAGAACCATGAGATTCGAATT |
| 2051729 | TCAGGTTCTACATTTAAAGAGGTATCTGGAACCTATTTGAAGAACCATGAGATTCGAATT |
| GD-0073 | TCAGGTTCTACATTTAAAGAGGTATCTGGAACCTATTTGAAGAACCATGAGATTCGAATT |
| GD-0096 | TCAGGTTCTACATTTAAAGAGGTATCTGGAACCTATTTGAAGAACCATGAGATTCGAATT |
| 931260  | TCGGGAACAGTTTATATAAATATTTCAAATCTGATTCGATAGCTTCAAAGTTATTCTT   |
| GD-0057 | TCGGGAACAGTTTATATAAATATTTCAAATCTGATTCGATAGCTTCAAAGTTATTCTT   |
| GD-0119 | TCGGGAACAGTTTATATAAATATTTCAAATCTGATTCGATAGCTTCAAAGTTATTCTT   |
| YS12    | TCAGGTTCTACATTTAAAGAGGTATCTGGAACCTATTTGAAGAACCATGAGATTCGAATT |

---

|         |                                                              |
|---------|--------------------------------------------------------------|
| 861160  | CCAATAAAAGATCAATTTTTAGTTGACTTCCATAAAACAGTGCAACCATTATTTAATTTA |
| 920694  | CCAATAAAAGATCAATTTTTAGTTGACTTCCATAAAACAGTGCAACCATTATTTAATTTA |
| 941372  | CCAATAAAAGATCAATTTTTAGTTGACTTCCATAAAACAGTGCAACCATTATTTAATTTA |
| 2001171 | CCAATAAAAGATCAATTTTTAGTTGACTTCCATAAAACAGTGCAACCATTATTTAATTTA |
| GD-0098 | CCAATAAAAGATCAATTTTTAGTTGACTTCCATAAAACAGTGCAACCATTATTTAATTTA |
| 940255  | CCG---CCCCATTAGCAATAATTAAAGTTTCATGAGTCAGTTGAGCCACTATTCAGACA  |
| 950136  | CCG---CCCCATTAGCAATAATTAAAGTTTCATGAGTCAGTTGAGCCACTATTCAGACA  |
| 2012092 | CCG---CCCCATTAGCAATAATTAAAGTTTCATGAGTCAGTTGAGCCACTATTCAGACA  |
| 2302008 | CCG---CCCCATTAGCAATAATTAAAGTTTCATGAGTCAGTTGAGCCACTATTCAGACA  |
| 2051729 | CCG---CCCCATTAGCAATAATTAAAGTTTCATGAGTCAGTTGAGCCACTATTCAGACA  |
| GD-0073 | CCG---CCCCATTAGCAATAATTAAAGTTTCATGAGTCAGTTGAGCCACTATTCAGACA  |
| GD-0096 | CCG---CCCCATTAGCAATAATTAAAGTTTCATGAGTCAGTTGAGCCACTATTCAGACA  |
| 931260  | CCAATAAAAGATCAATTTTTAGTTGACTTCCATAAAACAGTGCAACCATTATTTAATTTA |
| GD-0057 | CCAATAAAAGATCAATTTTTAGTTGACTTCCATAAAACAGTGCAACCATTATTTAATTTA |
| GD-0119 | CCAATAAAAGATCAATTTTTAGTTGACTTCCATAAAACAGTGCAACCATTATTTAATTTA |
| YS12    | CCG---CCCCATTAGCAATAATTAAAGTTTCATGAGTCAGTTGAGCCACTATTCAGACA  |

Cons.Reg.

|         |                                                              |
|---------|--------------------------------------------------------------|
| 861160  | ATATTTAATAATAATGCTGAAATTCAAAAGTTATCCGAGTTAAGGGATTGCCTCTTGCCA |
| 920694  | ATATTTAATAATAATGCTGAAATTCAAAAGTTATCCGAGTTAAGGGATTGCCTCTTGCCA |
| 941372  | ATATTTAATAATAATGCTGAAATTCAAAAGTTATCCGAGTTAAGGGATTGCCTCTTGCCA |
| 2001171 | ATATTTAATAATAATGCTGAAATTCAAAAGTTATCCGAGTTAAGGGATTGCCTCTTGCCA |
| GD-0098 | ATATTTAATAATAATGCTGAAATTCAAAAGTTATCCGAGTTAAGGGATTGCCTCTTGCCA |
| 940255  | ATTAATTTGAATGAGAAAGAGATTCAAAAGTTAATCGAAGTGCGCGATCTTTTACTACCA |
| 950136  | ATTAATTTGAATGAGAAAGAGATTCAAAAGTTAATCGAAGTGCGCGATCTTTTACTACCA |
| 2012092 | ATTAATTTGAATGAGAAAGAGATTCAAAAGTTAATCGAAGTGCGCGATCTTTTACTACCA |
| 2302008 | ATTAATTTGAATGAGAAAGAGATTCAAAAGTTAATCGAAGTGCGCGATCTTTTACTACCA |
| 2051729 | ATTAATTTGAATGAGAAAGAGATTCAAAAGTTAATCGAAGTGCGCGATCTTTTACTACCA |
| GD-0073 | ATTAATTTGAATGAGAAAGAGATTCAAAAGTTAATCGAAGTGCGCGATCTTTTACTACCA |
| GD-0096 | ATTAATTTGAATGAGAAAGAGATTCAAAAGTTAATCGAAGTGCGCGATCTTTTACTACCA |
| 931260  | ATATTTAATAATAATGCTGAAATTCAAAAGTTATCCGAGTTAAGGGATTGCCTCTTGCCA |
| GD-0057 | ATATTTAATAATAATGCTGAAATTCAAAAGTTATCCGAGTTAAGGGATTGCCTCTTGCCA |
| GD-0119 | ATATTTAATAATAATGCTGAAATTCAAAAGTTATCCGAGTTAAGGGATTGCCTCTTGCCA |
| YS12    | ATTAATTTGAATGAGAAAGAGATTCAAAAGTTAATCGAAGTGCGCGATCTTTTACTACCA |

Cons.Reg.

|         |                                               |
|---------|-----------------------------------------------|
| 861160  | AAACTCCTATCAGGCGAAATTTCCATAAATCAAGCCACTAAATGA |
| 920694  | AAACTCCTATCAGGCGAAATTTCCATAAATCAAGCCACTAAATGA |
| 941372  | AAACTCCTATCAGGCGAAATTTCCATAAATCAAGCCACTAAATGA |
| 2001171 | AAACTCCTATCAGGCGAAATTTCCATAAATCAAGCCACTAAATGA |
| GD-0098 | AAACTCCTATCAGGCGAAATTTCCATAAATCAAGCCACTAAATGA |
| 940255  | ACGCTTATGTCAGGCGAAATATCAGTCTCTGATTAA-----     |
| 950136  | ACGCTTATGTCAGGCGAAATATCAGTCTCTGATTAA-----     |
| 2012092 | ACGCTTATGTCAGGCGAAATATCAGTCTCTGATTAA-----     |
| 2302008 | ACGCTTATGTCAGGCGAAATATCAGTCTCTGATTAA-----     |
| 2051729 | ACGCTTATGTCAGGCGAAATATCAGTCTCTGATTAA-----     |
| GD-0073 | ACGCTTATGTCAGGCGAAATATCAGTCTCTGATTAA-----     |
| GD-0096 | ACGCTTATGTCAGGCGAAATATCAGTCTCTGATTAA-----     |
| 931260  | AAACTCCTATCAGGCGAAATTTCCATAAATCAAGCCACTAAATGA |
| GD-0057 | AAACTCCTATCAGGCGAAATTTCCATAAATCAAGCCACTAAATGA |
| GD-0119 | AAACTCCTATCAGGCGATATTTCCATAAATCAAGCCACTAAATGA |
| YS12    | ACGCTTATGTCAGGCGAAATATCAGTCTCTGATTAA-----     |
