# Supplementary material for: Distribution of Type I Restriction–Modification Systems in Streptococcus suis: An Outlook
Source: Pathogens. 2016 Nov 18;5(4):62. doi: 10.3390/pathogens5040062 (PMC5198162; doi:10.3390/pathogens5040062)
Supplement: Supplementary file 1 [file pathogens-05-00062-s001.zip]

Archive with 8 entries (8 files):
- table_s2.xlsx
- table_s1.xlsx
- figure_s1.pdf
- table_s3.xlsx
- supplementary-legends-revised-2-final.pdf
- figure_s2.pdf
- figure_s3.pdf
- figure_s4.pdf
