# Supplementary material for: Distribution of Type I Restriction–Modification Systems in Streptococcus suis: An Outlook
Source: Pathogens. 2016 Nov 18;5(4):62. doi: 10.3390/pathogens5040062 (PMC5198162; doi:10.3390/pathogens5040062)
Supplement: Supplementary file 1 [file pathogens-05-00062-s001.zip › table_s1.xlsx]

## Sheet: Sheet1
best_hit	species	accession	query_cover	identity	domains	putative_function
site-specific integrase	Streptococcus ovis	WP_018378871	100	99	cd01189, pfam00589, pfam14659, pfam14657, COG0582, TIGR02224, PRK00236	XerC (Phage) integrase
transcriptional regulator	MULTISPECIES: Streptococcus	WP_003046517	100	100	cd00093, smart00530, pfam01381	HTH_XRE, Helix-turn-helix, XRE-family like proteins
hypothetical protein	MULTISPECIES: Streptococcus	WP_001287945	100	100	pfam07471	Phage DNA packaging protein Nu1
hypothetical protein	Streptococcus suis	WP_024405915	100	100	pfam09681, TIGR01714	N-terminal region of Phage replisome organizer
hypothetical protein	MULTISPECIES: Streptococcus	WP_000158582	86	100	none	none
bacterial mobilization protein	Streptococcus suis	CYW84277	100	98	none	none
hypothetical protein	Streptococcus suis	WP_024405917	100	100	none	none
DNA methyltransferase	Streptococcus suis	WP_024405918	100	100	pfam12161, pfam13659, pfam04931, pfam02384, COG0286, TIGR00497, pfam13654	HsdM, Type I restriction modification system M subunit
hypothetical protein	Streptococcus agalactiae	WP_017643938	96	70	pfam01420, COG0732	HsdS, Type I restriction modification DNA specificity domain
integrase	Streptococcus suis	WP_024405921	100	100	cd00397, pfam00589, pfam13495, PRK09871, PRK00236, TIGR02224, COG4974	XerD/XerC (Phage) integrase
Type I restriction endonuclease subunit S	Streptococcus ovis	WP_018378835	100	98	pfam01420, COG0732, PRK09737	HsdS Type I restriction modification DNA specificity domain
restriction endonuclease S subunits	Streptococcus suis	WP_024405922	100	100	pfam01420, COG0732, PRK09737	HsdS Type I restriction modification DNA specificity domain
hypothetical protein	Streptococcus suis	WP_024405923	100	100	none	none
molecular chaperone Tir	Streptococcus suis	WP_024405924	100	100	pfam08937	MTH538 TIR-like domain
deoxyribonuclease HsdR	Streptococcus suis	WP_024405925	100	100	pfam11867, pfam04851, pfam04313, cd00046, COG2317, COG0610, TIGR00348, smart00487, PRK11448	Type I site-specific restriction-modification system R
ATP-dependent DNA helicase	Streptococcus suis	WP_024405926	95	100	pfam13749, pfam04326, pfam12802, COG2865	Predicted transcriptional regulator
type III restriction endonuclease subunit R	Streptococcus dysgalactiae	WP_065957477	100	99	pfam04851, cd00079, smart00490, pfam00271, cd00046, smart00487, COG1061, TIGR04095, TIGR00631, COG0556	Type III restriction enzyme, DNA or RNA helicase
