# Supplementary material for: Distribution of Type I Restriction–Modification Systems in Streptococcus suis: An Outlook
Source: Pathogens. 2016 Nov 18;5(4):62. doi: 10.3390/pathogens5040062 (PMC5198162; doi:10.3390/pathogens5040062)
Supplement: Supplementary file 1 [file pathogens-05-00062-s001.zip › table_s2.xlsx]

## Sheet: Blad1
Isolate	S subunit variant	Serotype	Sequence type	Clonal complex	Origin	Accession nr	Reference
861160	1	2	20	20	Netherlands	ERS902326	Willemse et al. [9]
920694	1	2	20	20	Netherlands	ERS902331	Willemse et al. [9]
941372	1	2	20	20	Netherlands	ERS902336	Willemse et al. [9]
2001171	1	2	20	20	Netherlands	ERS902341	Willemse et al. [9]
GD-0098	1	4	17	20	Netherlands	ERS902403	Willemse et al. [9]
940255	2	2	20	20	Netherlands	ERS902334	Willemse et al. [9]
950136	2	2	20	20	Netherlands	ERS902337	Willemse et al. [9]
2012092	2	2	20	20	Netherlands	ERS902344	Willemse et al. [9]
2032008	2	2	20	20	Netherlands	ERS902345	Willemse et al. [9]
2051729	2	2	20	20	Netherlands	ERS902346	Willemse et al. [9]
GD-0073	2	4	17	20	Netherlands	ERS902391	Willemse et al. [9]
GD-0096	2	2	20	20	Netherlands	ERS902402	Willemse et al. [9]
931260	3	2	20	20	Netherlands	ERS902332	Willemse et al. [9]
GD-0057	3	4	17	20	Netherlands	ERS902384	Willemse et al. [9]
GD-0119	3	2	20	20	Netherlands	ERS902415	Willemse et al. [9]
YS12	4	7	17	20	China	ALMB00000000	Chen et al. [15]
9. Willemse, N.; Howell, K.J.; Weinert, L.A.; Heuvelink, A.; Pannekoek, Y.; Wagenaar, J.A.; Smith, H.E.; van der Ende, A.; Schultsz, C. An emerging zoonotic clone in the netherlands provides clues to virulence and zoonotic potential of Streptococcus suis. Scientific reports 2016, 6, 28984.
15. Chen, C.; Zhang, W.; Zheng, H.; Lan, R.; Wang, H.; Du, P.; Bai, X.; Ji, S.; Meng, Q.; Jin, D., et al. Minimum core genome sequence typing of bacterial pathogens: A unified approach for clinical and public health microbiology. J Clin Microbiol 2013, 51, 2582-2591.
