# Supplementary material for: Distribution of Type I Restriction–Modification Systems in Streptococcus suis: An Outlook
Source: Pathogens. 2016 Nov 18;5(4):62. doi: 10.3390/pathogens5040062 (PMC5198162; doi:10.3390/pathogens5040062)
Supplement: Supplementary file 1 [file pathogens-05-00062-s001.zip › table_s3.xlsx]

## Sheet: isolates_summary
Strain	Year	Serotype	Sequence type†	Clonal complex	Host	Phenotype	Source	Accession	Reads	SsuPORF1588P	SsuPORF1273P	SsuPORF652P	SsuCC20P	Ssu13ORF242P
Kolom1	Kolom2	Kolom3	Kolom4	Kolom5	Kolom6	Kolom7	Kolom8	Kolom9	Kolom10	Kolom11	Kolom12	Kolom13	Kolom14	Kolom15
P1/7	NA	2	1	1	Pig	Meningitis	UK	AM946016		yes	yes	yes	no	no
05ZYH33	2005	2	7	1	Human	Meningitis	China	CP000407		yes	yes	yes	no	no
98HAH33	1998	2	7	1	Human	Meningitis	China	CP000408		yes	yes	no	no	no
GZ1	NA	2	1	1	Human	Unknown	China	CP000837		yes	yes	no	no	no
JS14	NA	14	7	1	Pig	Arthritis	China	CP002465		yes	yes	yes	no	no
A7	NA	2	7	1	Pig	Meningitis	China	CP002570		yes	yes	yes	no	no
ST3	NA	3	29	29	Pig	Respiratory	China	CP002633		yes	no	no	no	no
SS12	NA	1+2	1	1	Pig	Respiratory	China	CP002640		yes	yes	yes	no	no
D9	NA	7	29	29	Pig	Unknown	China	CP002641		yes	no	no	no	no
D12	NA	9		S	Pig	Respiratory	China	CP002644		yes	no	no	no	no
ST1	NA	1	13	13	Pig	Unknown	China	CP002651		yes	no	no	no	no
S735	NA	2	1	1	Pig	Respiratory	Netherlands	CP003736		yes	yes	yes	no	no
SC070731	2007	2	7	1	Pig	Meningitis	China	CP003922		yes	yes	yes	no	no
TL13	NA	16		S	Pig	Healthy	China	CP003993		no	no	no	no	yes
YB51	NA	3	29	29	Pig	Healthy	China	CP006645		yes	no	no	no	no
6407	1981	4	54	S	Pig	Respiratory	Denmark	CP008921		no	no	no	no	no
SC84	2005	2	7	1	Human	Meningitis	China	FM252031		yes	yes	yes	no	no
BM407	2004	2	1	1	Human	Meningitis	Vietnam	FM252032		yes	yes	yes	no	no
6112	1992	1	1	1	Pig	Meningitis	Netherlands	ERS902322	ERR1055550	yes	yes	yes	no	no
6388	1992	1	1	1	Pig	Meningitis	Netherlands	ERS902323	ERR1055551	yes	yes	yes	no	no
6555	NA	1	13	13	Pig	Meningitis	Netherlands	ERS902324	ERR1055552	yes	no	no	no	no
8067	1996	9	136	16	Pig	Meningitis	Netherlands	ERS902325	ERR1055553	yes	yes	no	no	no
861160	1986	2	20	20	Human	Meningitis	Netherlands	ERS902326	ERR1055554	yes	yes	no	yes	no
870040	1987	2	1	1	Human	Meningitis	Netherlands	ERS902327	ERR1055555	yes	yes	yes	no	no
890267	1989	2	1	1	Human	Meningitis	Netherlands	ERS902328	ERR1055556	yes	yes	yes	no	no
901131	1990	2	134	1	Human	Meningitis	Netherlands	ERS902329	ERR1055557	yes	yes	yes	no	no
902409	1990	2	1	1	Human	Meningitis	Netherlands	ERS902330	ERR1055558	yes	yes	yes	no	no
920694	1992	2	20	20	Human	Meningitis	Netherlands	ERS902331	ERR1055559	yes	yes	no	yes	no
931260	1993	2	20	20	Human	Meningitis	Netherlands	ERS902332	ERR1055560	yes	yes	no	yes	no
940056	1994	2	1	1	Human	Meningitis	Netherlands	ERS902333	ERR1055561	yes	yes	yes	no	no
940255	1994	2	20	20	Human	Meningitis	Netherlands	ERS902334	ERR1055562	yes	yes	no	yes	no
940430	1994	2	1	1	Human	Meningitis	Netherlands	ERS902335	ERR1055563	yes	yes	yes	no	no
941372	1994	2	20	20	Human	Meningitis	Netherlands	ERS902336	ERR1055564	yes	yes	no	yes	no
950136	1995	2	20	20	Human	Meningitis	Netherlands	ERS902337	ERR1055565	yes	yes	no	yes	no
971344	1997	2	1	1	Human	Meningitis	Netherlands	ERS902338	ERR1055566	yes	yes	yes	no	no
971724	1997	2	1	1	Human	Meningitis	Netherlands	ERS902339	ERR1055567	yes	yes	yes	no	no
2000343	2000	2	1	1	Human	Meningitis	Netherlands	ERS902340	ERR1055568	yes	yes	yes	no	no
2001171	2000	2	20	20	Human	Meningitis	Netherlands	ERS902341	ERR1055569	yes	yes	no	yes	no
2001946	2000	2	1	1	Human	Meningitis	Netherlands	ERS902342	ERR1055570	yes	yes	yes	no	no
2011423	2001	2	1	1	Human	Meningitis	Netherlands	ERS902343	ERR1055571	yes	yes	yes	no	no
2012092	2001	2	20	20	Human	Meningitis	Netherlands	ERS902344	ERR1055572	yes	yes	no	yes	no
2032008	2003	2	20	20	Human	Meningitis	Netherlands	ERS902345	ERR1055573	yes	yes	no	yes	no
2051729	2005	2	20	20	Human	Meningitis	Netherlands	ERS902346	ERR1055574	yes	yes	no	yes	no
2061238	2006	2	146	1	Human	Meningitis	Netherlands	ERS902347	ERR1055575	yes	yes	yes	no	no
2061410	2006	2	1	1	Human	Meningitis	Netherlands	ERS902348	ERR1055576	yes	yes	yes	no	no
2071319	2007	2	1	1	Human	Meningitis	Netherlands	ERS902349	ERR1055577	yes	yes	yes	no	no
9401240	2006	9	220	S	Pig	Meningitis	Netherlands	ERS902350	ERR1055578	no	no	no	no	no
9402159	2006	1	13	13	Pig	Meningitis	Netherlands	ERS902351	ERR1055579	yes	no	no	no	no
9402372	2006	9	16	16	Pig	Meningitis	Netherlands	ERS902352	ERR1055580	yes	yes	no	no	no
9406160	2006	9	16	16	Pig	Meningitis	Netherlands	ERS902353	ERR1055581	yes	yes	no	no	no
9501632	2006	8	87	16	Pig	Meningitis	Netherlands	ERS902354	ERR1055582	yes	no	yes	no	no
12V457	2006	7	29	29	Pig	Meningitis	Netherlands	ERS902355	ERR1055583	yes	no	no	no	no
C160	1991	1	1	1	Pig	Sepsis	Netherlands	ERS902356	ERR1055584	yes	yes	yes	no	no
C187	1992	1	132	1	Pig	Sepsis	Netherlands	ERS902357	ERR1055585	yes	yes	yes	no	no
GD-0001	1996	2	20	20	Pig	Meningitis	Netherlands	ERS902358	ERR1055586	yes	yes	no	no	no
GD-0002	1996	9	16	16	Pig	Meningitis	Netherlands	ERS902359	ERR1055587	yes	yes	no	no	no
GD-0004	1997	9	16	16	Pig	Meningitis	Netherlands	ERS902360	ERR1055588	yes	yes	no	no	no
GD-0006	1998	9	16	16	Pig	Meningitis	Netherlands	ERS902361	ERR1055589	yes	yes	no	no	no
GD-0007	1999	9	16	16	Pig	Meningitis	Netherlands	ERS902362	ERR1055590	yes	yes	no	no	no
GD-0008	1999	1+2	28	27	Pig	Meningitis	Netherlands	ERS902363	ERR1055591	yes	no	no	no	no
GD-0010	1999	2	1	1	Pig	Meningitis	Netherlands	ERS902364	ERR1055592	yes	yes	yes	no	no
GD-0012	2007	9	16	16	Pig	Meningitis	Netherlands	ERS902365	ERR1055593	yes	yes	no	no	no
GD-0013	2000	2	1	1	Pig	Meningitis	Netherlands	ERS902366	ERR1055594	yes	yes	yes	no	no
GD-0015	2000	NT	183	S	Pig	Meningitis	Netherlands	ERS902367	ERR1055595	no	yes	yes	no	no
GD-0018	2000	9	16	16	Pig	Meningitis	Netherlands	ERS902368	ERR1055596	yes	yes	no	no	no
GD-0021	2001	9	16	16	Pig	Meningitis	Netherlands	ERS902369	ERR1055597	yes	yes	no	no	no
GD-0023	2001	1	1	1	Pig	Meningitis	Netherlands	ERS902370	ERR1055598	yes	yes	yes	no	no
GD-0025	2001	2	1	1	Pig	Meningitis	Netherlands	ERS902371	ERR1055599	yes	yes	yes	no	no
GD-0027	2002	7	218	S	Pig	Meningitis	Netherlands	ERS902372	ERR1055600	no	no	no	no	no
GD-0028	2002	9	16	16	Pig	Meningitis	Netherlands	ERS902373	ERR1055601	yes	yes	no	no	no
GD-0031	2002	7	29	29	Pig	Meningitis	Netherlands	ERS902374	ERR1055602	yes	no	no	no	no
GD-0032	2002	1	13	13	Pig	Meningitis	Netherlands	ERS902375	ERR1055603	yes	no	no	no	no
GD-0034	2002	9	16	16	Pig	Meningitis	Netherlands	ERS902376	ERR1055604	yes	yes	no	no	no
GD-0036	2002	1	1	1	Pig	Meningitis	Netherlands	ERS902377	ERR1055605	yes	yes	yes	no	no
GD-0049	2003	2	1	1	Pig	Meningitis	Netherlands	ERS902378	ERR1055606	yes	yes	yes	no	no
GD-0050	2003	3	15	16	Pig	Meningitis	Netherlands	ERS902379	ERR1055607	yes	yes	yes	no	no
GD-0051	2003	9	136	16	Pig	Meningitis	Netherlands	ERS902380	ERR1055608	yes	yes	no	no	no
GD-0052	2003	9	16	16	Pig	Meningitis	Netherlands	ERS902381	ERR1055609	yes	yes	no	no	no
GD-0053	2003	1	13	13	Pig	Meningitis	Netherlands	ERS902382	ERR1055610	yes	no	no	no	no
GD-0054	2004	9	16	16	Pig	Meningitis	Netherlands	ERS902383	ERR1055611	yes	yes	no	no	no
GD-0057	2004	4	17	20	Pig	Meningitis	Netherlands	ERS902384	ERR1055612	yes	yes	yes	yes	no
GD-0061	2004	7	150	S	Pig	Meningitis	Netherlands	ERS902385	ERR1055613	yes	no	no	no	no
GD-0063	2004	3	15	16	Pig	Meningitis	Netherlands	ERS902386	ERR1055614	yes	yes	yes	no	no
GD-0065	2004	2	1	1	Pig	Meningitis	Netherlands	ERS902387	ERR1055615	yes	yes	yes	no	no
GD-0067	2004	7	29	29	Pig	Meningitis	Netherlands	ERS902388	ERR1055616	yes	no	no	no	no
GD-0070	2005	7	29	29	Pig	Meningitis	Netherlands	ERS902389	ERR1055617	yes	no	no	no	no
GD-0072	2005	9	155	16	Pig	Meningitis	Netherlands	ERS902390	ERR1055618	yes	yes	no	no	no
GD-0073	2005	4	17	20	Pig	Meningitis	Netherlands	ERS902391	ERR1055619	yes	yes	yes	yes	no
GD-0076	2005	9	16	16	Pig	Meningitis	Netherlands	ERS902392	ERR1055620	yes	yes	no	no	no
GD-0077	2005	2	1	1	Pig	Meningitis	Netherlands	ERS902393	ERR1055621	yes	yes	yes	no	no
GD-0079	2005	9	151	16	Pig	Meningitis	Netherlands	ERS902394	ERR1055622	yes	no	no	no	no
GD-0080	2005	9	136	16	Pig	Meningitis	Netherlands	ERS902395	ERR1055623	yes	yes	no	no	no
GD-0081	2005	9	16	16	Pig	Meningitis	Netherlands	ERS902396	ERR1055624	yes	yes	no	no	no
GD-0085	2006	9	16	16	Pig	Meningitis	Netherlands	ERS902397	ERR1055625	yes	yes	no	no	no
GD-0087	2006	9	136	16	Pig	Meningitis	Netherlands	ERS902398	ERR1055626	yes	yes	no	no	no
GD-0088	2006	9	16	16	Pig	Meningitis	Netherlands	ERS902399	ERR1055627	yes	yes	no	no	no
GD-0090	2006	2	1	1	Pig	Meningitis	Netherlands	ERS902400	ERR1055628	yes	yes	yes	no	no
GD-0094	2006	7	29	29	Pig	Meningitis	Netherlands	ERS902401	ERR1055629	yes	no	no	no	no
GD-0096	2006	2	20	20	Pig	Meningitis	Netherlands	ERS902402	ERR1055630	yes	yes	no	yes	no
GD-0098	2006	4	17	20	Pig	Meningitis	Netherlands	ERS902403	ERR1055631	yes	yes	yes	yes	no
GD-0100	2007	9	16	16	Pig	Meningitis	Netherlands	ERS902404	ERR1055632	yes	yes	no	no	no
GD-0101	2007	1+2	1	1	Pig	Meningitis	Netherlands	ERS902405	ERR1055633	yes	yes	yes	no	no
GD-0105	2007	2	184	S	Pig	Meningitis	Netherlands	ERS902406	ERR1055634	yes	no	no	no	yes
GD-0106	2007	9	16	16	Pig	Meningitis	Netherlands	ERS902407	ERR1055635	yes	yes	no	no	no
GD-0107	2007	2	1	1	Pig	Meningitis	Netherlands	ERS902408	ERR1055636	yes	yes	yes	no	no
GD-0108	2007	1	149	13	Pig	Meningitis	Netherlands	ERS902409	ERR1055637	yes	no	no	no	no
GD-0111	2007	9	136	16	Pig	Meningitis	Netherlands	ERS902410	ERR1055638	yes	yes	no	no	no
GD-0112	2007	8	198	16	Pig	Meningitis	Netherlands	ERS902411	ERR1055639	yes	yes	no	no	no
GD-0113	2008	1	1	1	Pig	Meningitis	Netherlands	ERS902412	ERR1055640	yes	yes	yes	no	no
GD-0114	2008	2	1	1	Pig	Meningitis	Netherlands	ERS902413	ERR1055641	yes	yes	yes	no	no
GD-0117	2008	9	16	16	Pig	Meningitis	Netherlands	ERS902414	ERR1055642	yes	yes	no	no	no
GD-0119	2008	2	20	20	Pig	Meningitis	Netherlands	ERS902415	ERR1055643	yes	yes	no	yes	no
GD-0120	2008	7	153	S	Pig	Meningitis	Netherlands	ERS902416	ERR1055644	yes	yes	no	no	no
OV585	2003	1	13	13	Pig	Meningitis	Netherlands	ERS902417	ERR1055645	no	no	no	no	no
S10	1982	2	1	1	Pig	Meningitis	Netherlands	ERS902418	ERR1055646	yes	yes	yes	no	no
S3	1988	2	1	1	Pig	Meningitis	Netherlands	ERS902419	ERR1055647	yes	yes	yes	no	no
†: Sequence type for isolates 98HAH33 and 05ZYH33 are documented to be ST7, but the sequences indicated truncated MLST genes.

## Sheet: Blad1
Sample accession	Secondary accession	Sample unique name
ERS902322	SAMEA3595173	6112	ERS902322	ERR1055550
ERS902323	SAMEA3595174	6388	ERS902323	ERR1055551
ERS902324	SAMEA3595175	6555	ERS902324	ERR1055552
ERS902325	SAMEA3595176	8067	ERS902325	ERR1055553
ERS902326	SAMEA3595177	861160	ERS902326	ERR1055554
ERS902327	SAMEA3595178	870040	ERS902327	ERR1055555
ERS902328	SAMEA3595179	890267	ERS902328	ERR1055556
ERS902329	SAMEA3595180	901131	ERS902329	ERR1055557
ERS902330	SAMEA3595181	902409	ERS902330	ERR1055558
ERS902331	SAMEA3595182	920694	ERS902331	ERR1055559
ERS902332	SAMEA3595183	931260	ERS902332	ERR1055560
ERS902333	SAMEA3595184	940056	ERS902333	ERR1055561
ERS902334	SAMEA3595185	940255	ERS902334	ERR1055562
ERS902335	SAMEA3595186	940430	ERS902335	ERR1055563
ERS902336	SAMEA3595187	941372	ERS902336	ERR1055564
ERS902337	SAMEA3595188	950136	ERS902337	ERR1055565
ERS902338	SAMEA3595189	971344	ERS902338	ERR1055566
ERS902339	SAMEA3595190	971724	ERS902339	ERR1055567
ERS902340	SAMEA3595191	2000343	ERS902340	ERR1055568
ERS902341	SAMEA3595192	2001171	ERS902341	ERR1055569
ERS902342	SAMEA3595193	2001946	ERS902342	ERR1055570
ERS902343	SAMEA3595194	2011423	ERS902343	ERR1055571
ERS902344	SAMEA3595195	2012092	ERS902344	ERR1055572
ERS902345	SAMEA3595196	2032008	ERS902345	ERR1055573
ERS902346	SAMEA3595197	2051729	ERS902346	ERR1055574
ERS902347	SAMEA3595198	2061238	ERS902347	ERR1055575
ERS902348	SAMEA3595199	2061410	ERS902348	ERR1055576
ERS902349	SAMEA3595200	2071319	ERS902349	ERR1055577
ERS902350	SAMEA3595201	9401240	ERS902350	ERR1055578
ERS902351	SAMEA3595202	9402159	ERS902351	ERR1055579
ERS902352	SAMEA3595203	9402372	ERS902352	ERR1055580
ERS902353	SAMEA3595204	9406160	ERS902353	ERR1055581
ERS902354	SAMEA3595205	9501632	ERS902354	ERR1055582
ERS902355	SAMEA3595206	12V457	ERS902355	ERR1055583
ERS902356	SAMEA3595207	C160	ERS902356	ERR1055584
ERS902357	SAMEA3595208	C187	ERS902357	ERR1055585
ERS902358	SAMEA3595209	GD-0001	ERS902358	ERR1055586
ERS902359	SAMEA3595210	GD-0002	ERS902359	ERR1055587
ERS902360	SAMEA3595211	GD-0004	ERS902360	ERR1055588
ERS902361	SAMEA3595212	GD-0006	ERS902361	ERR1055589
ERS902362	SAMEA3595213	GD-0007	ERS902362	ERR1055590
ERS902363	SAMEA3595214	GD-0008	ERS902363	ERR1055591
ERS902364	SAMEA3595215	GD-0010	ERS902364	ERR1055592
ERS902365	SAMEA3595216	GD-0012	ERS902365	ERR1055593
ERS902366	SAMEA3595217	GD-0013	ERS902366	ERR1055594
ERS902367	SAMEA3595218	GD-0015	ERS902367	ERR1055595
ERS902368	SAMEA3595219	GD-0018	ERS902368	ERR1055596
ERS902369	SAMEA3595220	GD-0021	ERS902369	ERR1055597
ERS902370	SAMEA3595221	GD-0023	ERS902370	ERR1055598
ERS902371	SAMEA3595222	GD-0025	ERS902371	ERR1055599
ERS902372	SAMEA3595223	GD-0027	ERS902372	ERR1055600
ERS902373	SAMEA3595224	GD-0028	ERS902373	ERR1055601
ERS902374	SAMEA3595225	GD-0031	ERS902374	ERR1055602
ERS902375	SAMEA3595226	GD-0032	ERS902375	ERR1055603
ERS902376	SAMEA3595227	GD-0034	ERS902376	ERR1055604
ERS902377	SAMEA3595228	GD-0036	ERS902377	ERR1055605
ERS902378	SAMEA3595229	GD-0049	ERS902378	ERR1055606
ERS902379	SAMEA3595230	GD-0050	ERS902379	ERR1055607
ERS902380	SAMEA3595231	GD-0051	ERS902380	ERR1055608
ERS902381	SAMEA3595232	GD-0052	ERS902381	ERR1055609
ERS902382	SAMEA3595233	GD-0053	ERS902382	ERR1055610
ERS902383	SAMEA3595234	GD-0054	ERS902383	ERR1055611
ERS902384	SAMEA3595235	GD-0057	ERS902384	ERR1055612
ERS902385	SAMEA3595236	GD-0061	ERS902385	ERR1055613
ERS902386	SAMEA3595237	GD-0063	ERS902386	ERR1055614
ERS902387	SAMEA3595238	GD-0065	ERS902387	ERR1055615
ERS902388	SAMEA3595239	GD-0067	ERS902388	ERR1055616
ERS902389	SAMEA3595240	GD-0070	ERS902389	ERR1055617
ERS902390	SAMEA3595241	GD-0072	ERS902390	ERR1055618
ERS902391	SAMEA3595242	GD-0073	ERS902391	ERR1055619
ERS902392	SAMEA3595243	GD-0076	ERS902392	ERR1055620
ERS902393	SAMEA3595244	GD-0077	ERS902393	ERR1055621
ERS902394	SAMEA3595245	GD-0079	ERS902394	ERR1055622
ERS902395	SAMEA3595246	GD-0080	ERS902395	ERR1055623
ERS902396	SAMEA3595247	GD-0081	ERS902396	ERR1055624
ERS902397	SAMEA3595248	GD-0085	ERS902397	ERR1055625
ERS902398	SAMEA3595249	GD-0087	ERS902398	ERR1055626
ERS902399	SAMEA3595250	GD-0088	ERS902399	ERR1055627
ERS902400	SAMEA3595251	GD-0090	ERS902400	ERR1055628
ERS902401	SAMEA3595252	GD-0094	ERS902401	ERR1055629
ERS902402	SAMEA3595253	GD-0096	ERS902402	ERR1055630
ERS902403	SAMEA3595254	GD-0098	ERS902403	ERR1055631
ERS902404	SAMEA3595255	GD-0100	ERS902404	ERR1055632
ERS902405	SAMEA3595256	GD-0101	ERS902405	ERR1055633
ERS902406	SAMEA3595257	GD-0105	ERS902406	ERR1055634
ERS902407	SAMEA3595258	GD-0106	ERS902407	ERR1055635
ERS902408	SAMEA3595259	GD-0107	ERS902408	ERR1055636
ERS902409	SAMEA3595260	GD-0108	ERS902409	ERR1055637
ERS902410	SAMEA3595261	GD-0111	ERS902410	ERR1055638
ERS902411	SAMEA3595262	GD-0112	ERS902411	ERR1055639
ERS902412	SAMEA3595263	GD-0113	ERS902412	ERR1055640
ERS902413	SAMEA3595264	GD-0114	ERS902413	ERR1055641
ERS902414	SAMEA3595265	GD-0117	ERS902414	ERR1055642
ERS902415	SAMEA3595266	GD-0119	ERS902415	ERR1055643
ERS902416	SAMEA3595267	GD-0120	ERS902416	ERR1055644
ERS902417	SAMEA3595268	OV585	ERS902417	ERR1055645
ERS902418	SAMEA3595269	S10	ERS902418	ERR1055646
ERS902419	SAMEA3595270	S3	ERS902419	ERR1055647
