# Supplementary figures and images for: Distribution of Type I Restriction–Modification Systems in Streptococcus suis: An Outlook
Source: MDPI journal article supplement (doi:10.3390/pathogens5040062), 2016-11-18

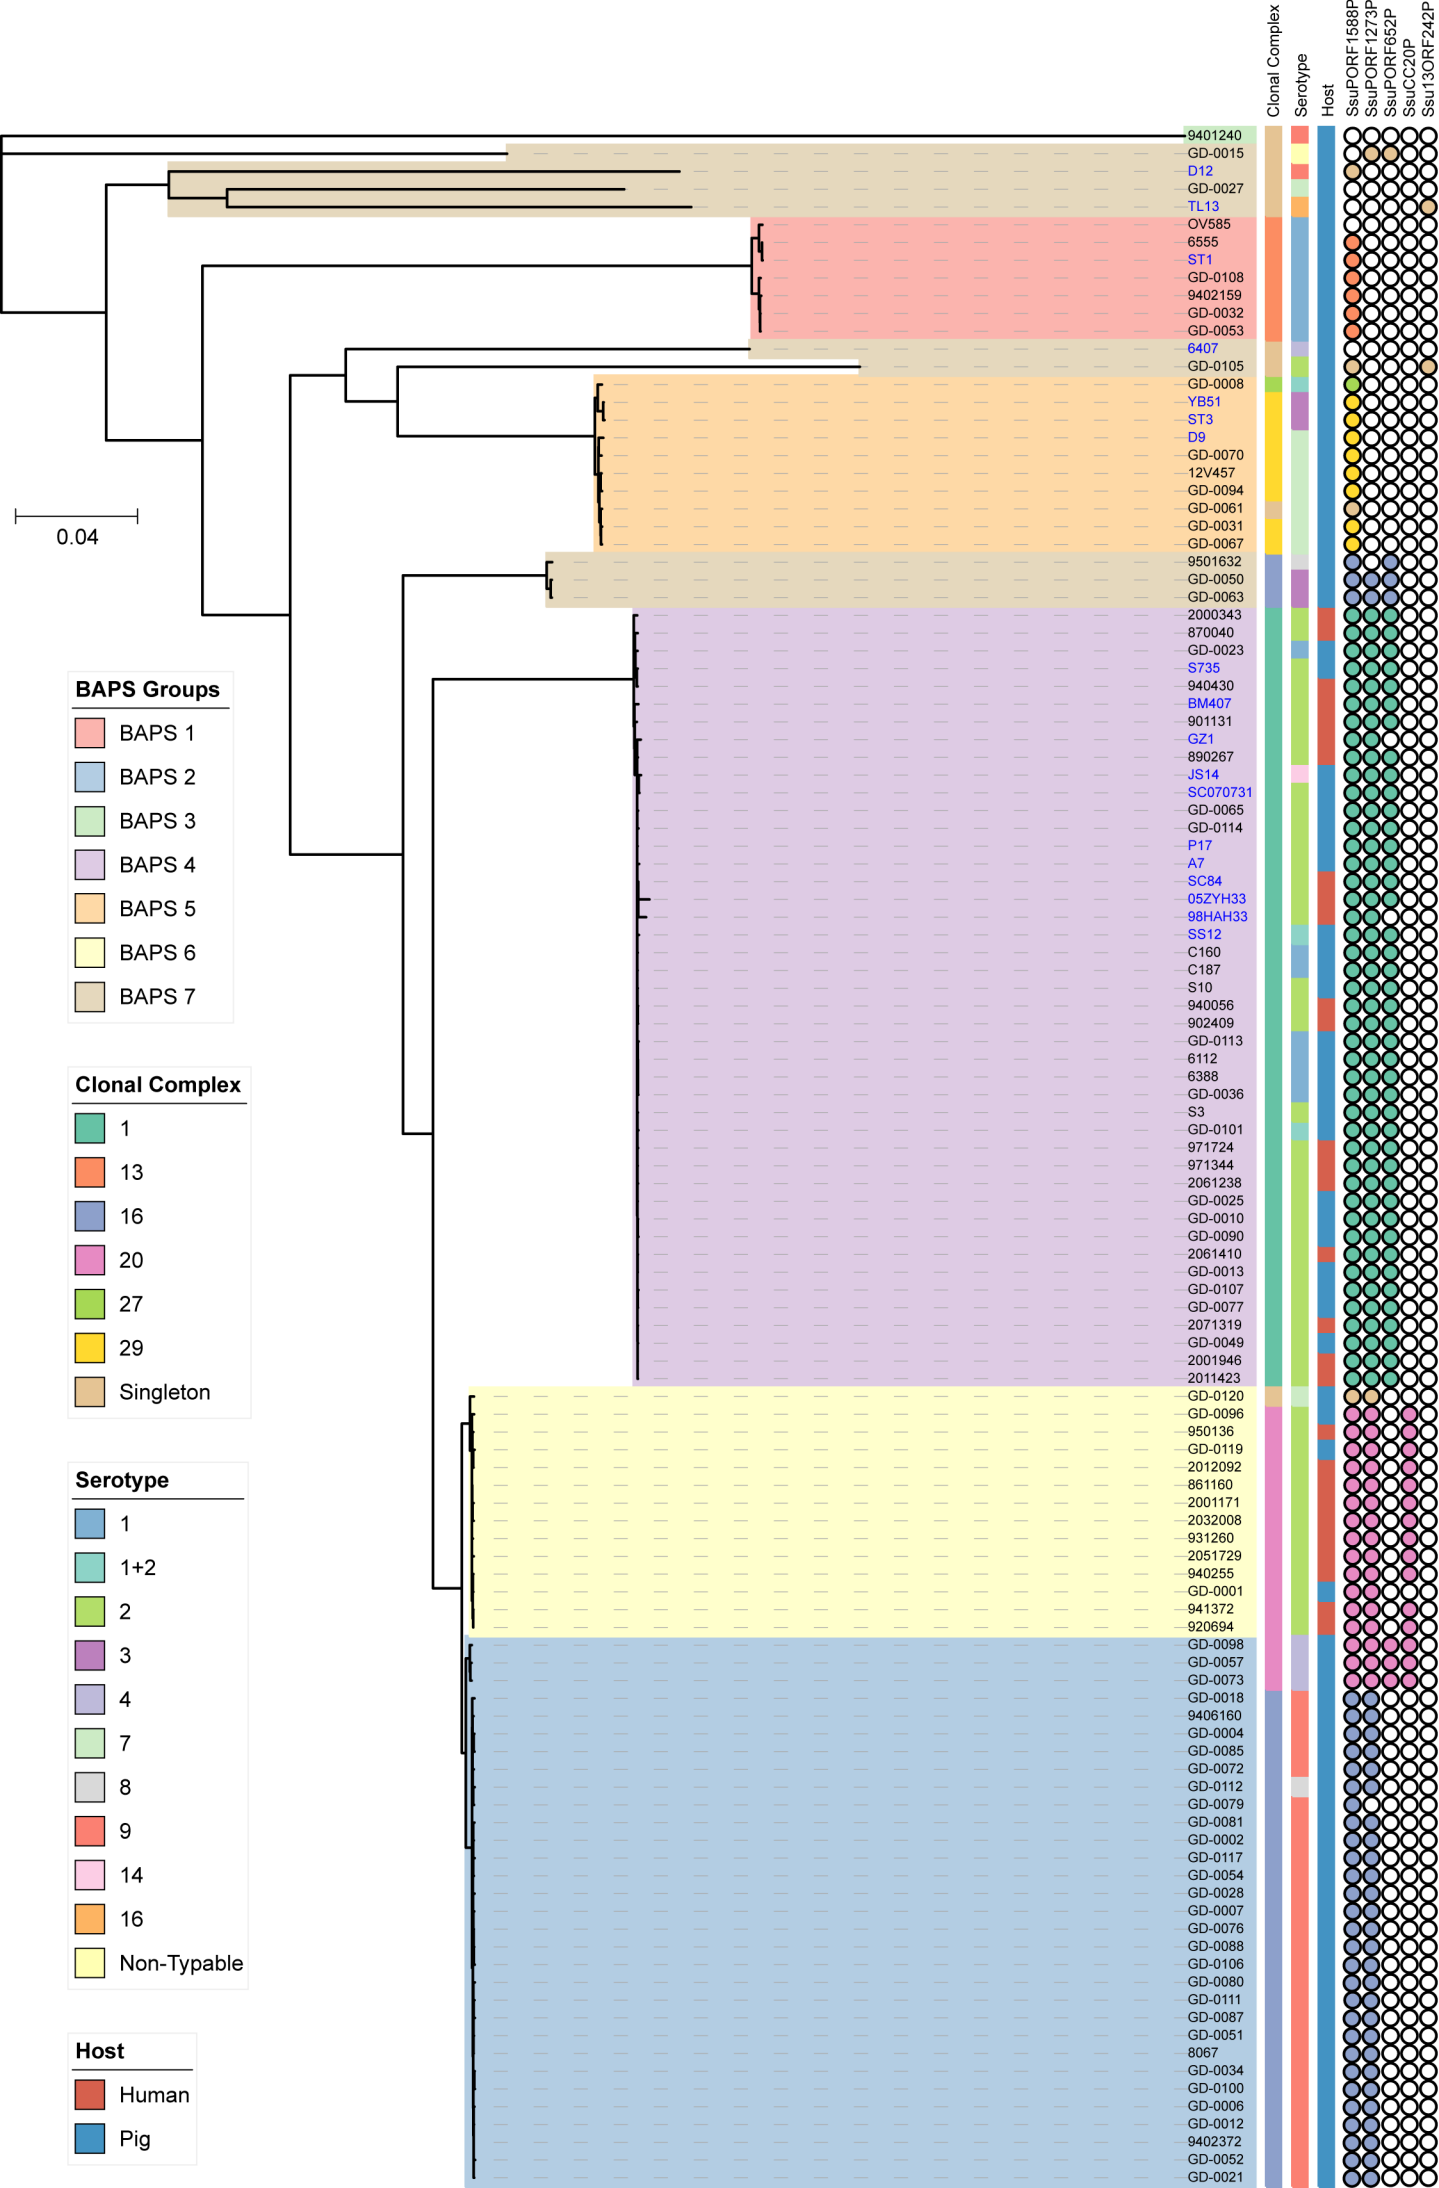

Supplement: s1 [file s1]

P1/7

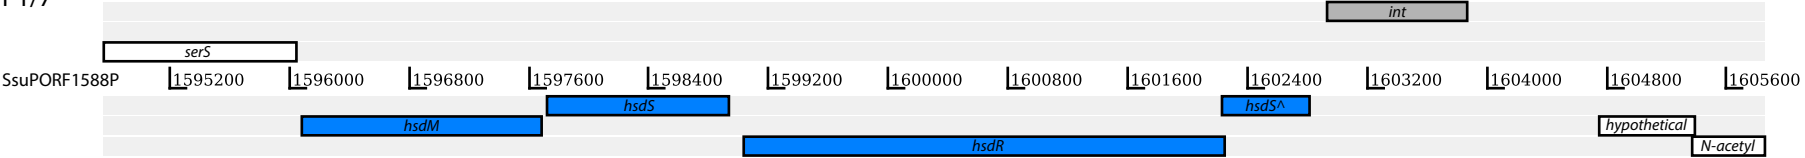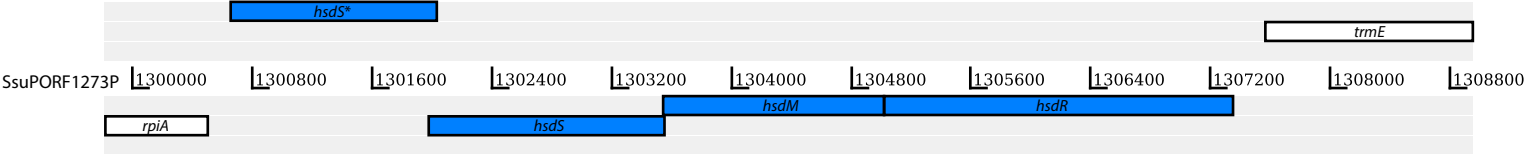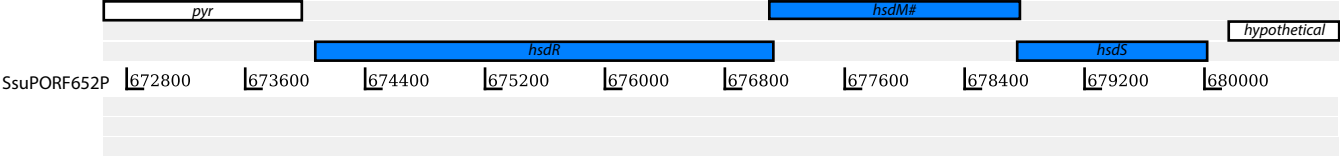

TL13

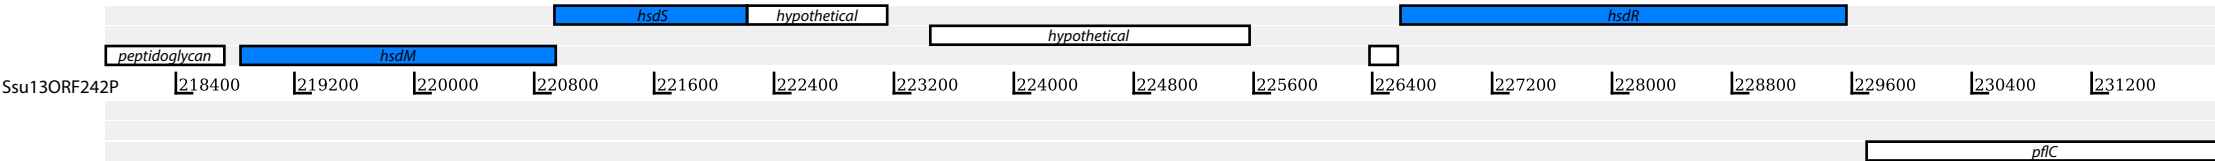

Supplement: s1 [file s1]

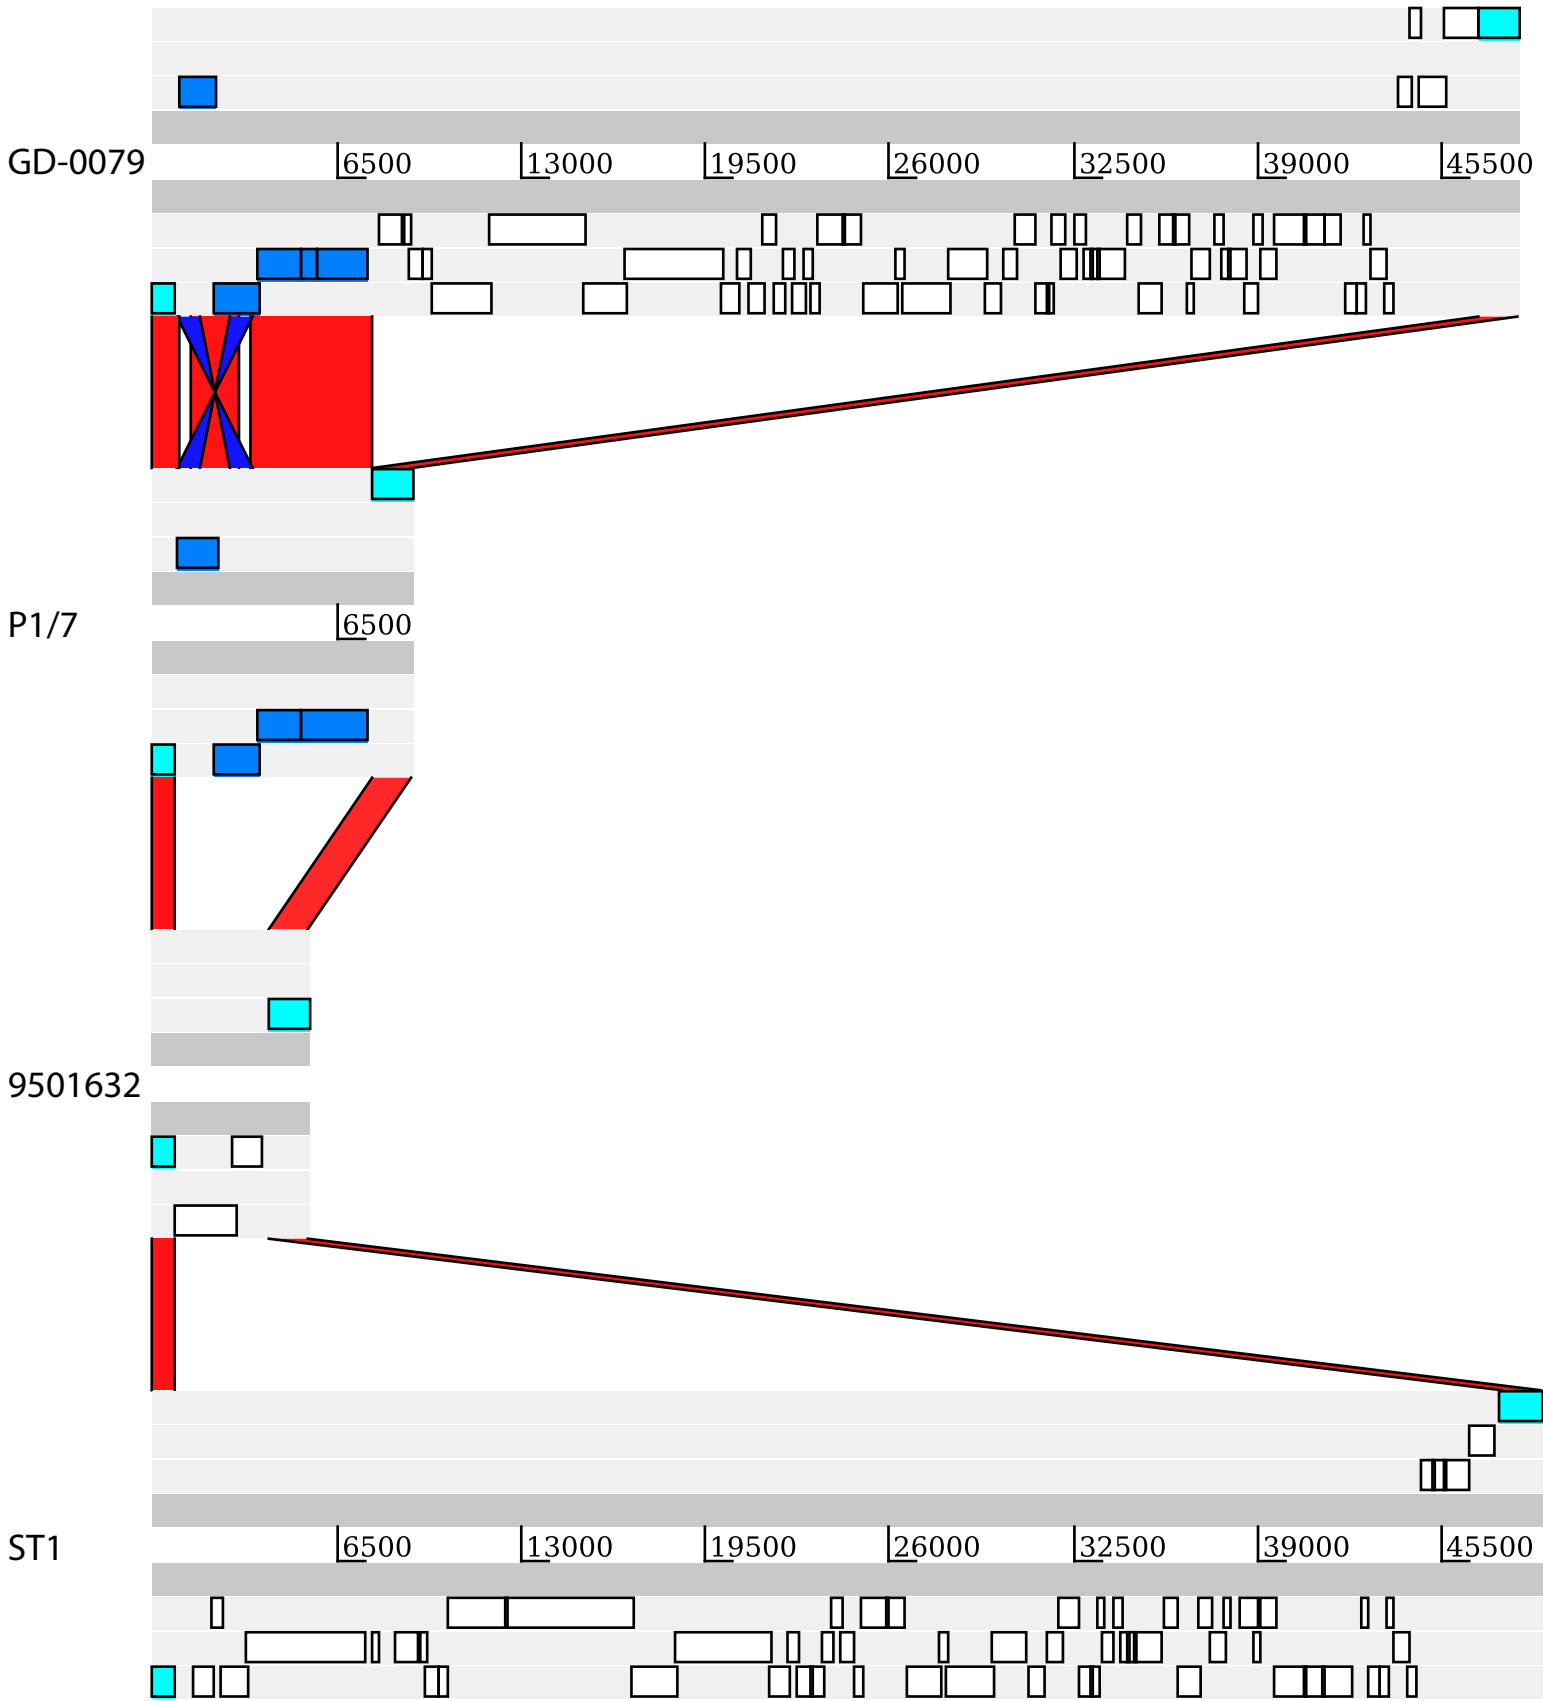

Supplement: s1 [file s1]
